# Supplementary material
Source: publisher figshare collection journal article supplement (https://acs.figshare.com/ndownloader/files/4854667)
Supplement: Supplementary file 1 [file 4854667]

## Supporting Information (SI)

### Dopamine Polymerization in Liquid Marbles: A General Route to Janus Particles Synthesis

Yifeng Sheng,<sup>a</sup> Guanqing Sun<sup>a</sup> and To Ngai<sup>a,b,\*</sup>

<sup>a</sup> Department of Chemistry, The Chinese University of Hong Kong, Shatin, New Territories, Hong Kong.

<sup>b</sup> Shenzhen Municipal Key Laboratory of Chemical Synthesis of Medicinal Organic Molecules, Shenzhen Research Institute, The Chinese University of Hong Kong; Shenzhen, 518057, P. R. China.

\* E-mail: [tongai@cuhk.edu.hk](mailto:tongai@cuhk.edu.hk)

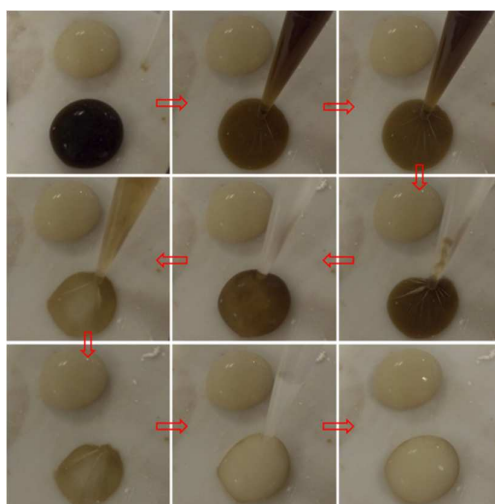

**Figure S1.** Illustration of the transformation of PD/SiO<sub>2</sub> Janus particles into further modified Janus particles via Method 2 as shown in the bottom of Figure 1B.

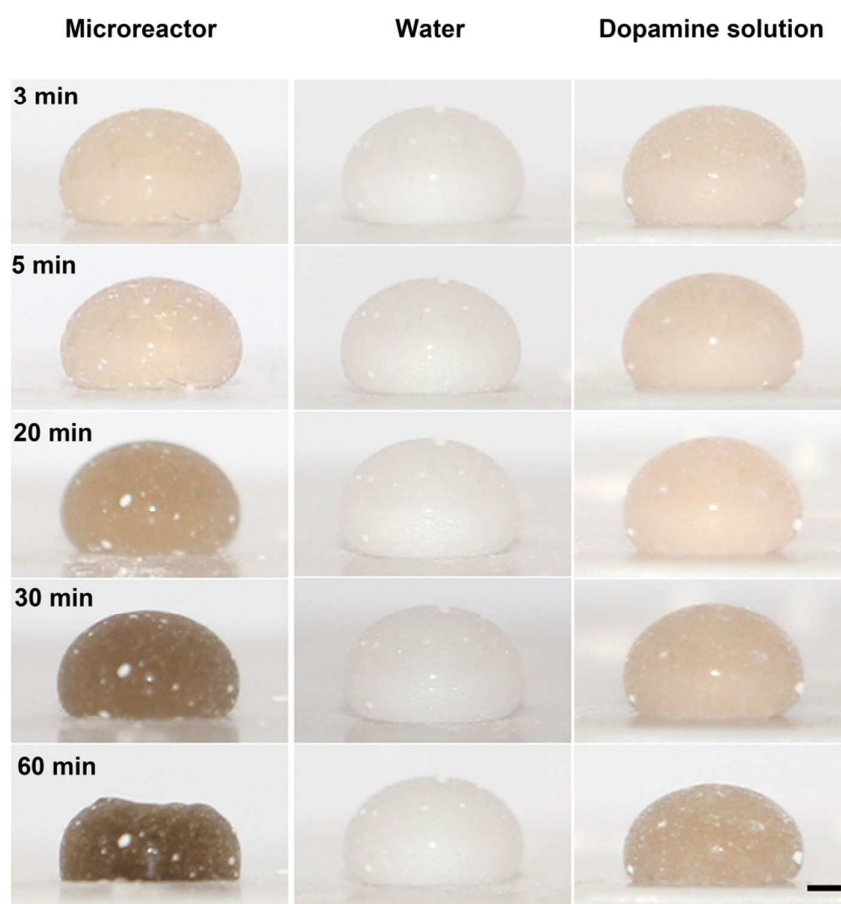

**Figure S2.** Side view of different liquid marbles at different reaction stages: (A) microreactor; (B) pure water; (C) dopamine hydrochloride aqueous solution (2 mg/mL). Scale bar: 1 mm.

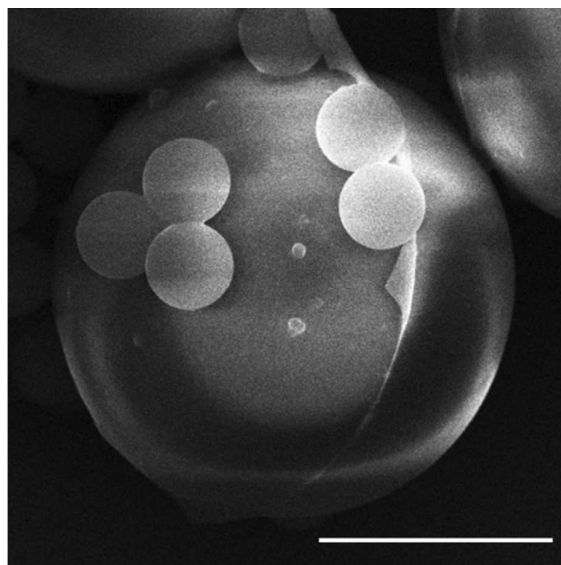

**Figure S3.** SEM image of PS(2  $\mu\text{m}$ )-PD/SiO<sub>2</sub> Janus particles synthesized from Method 1 (the top route in the Figure 1B). Scale bar: 5  $\mu\text{m}$ .

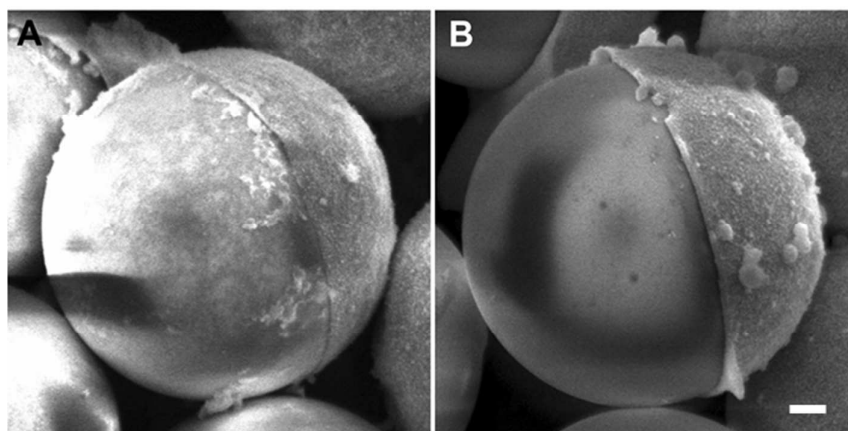

**Figure S4.** SEM images of Ag-PD hybrid films synthesized via Method 1 (A) and Method 2 (B) from 0.1 mol/L diamminesilver(I) solution. Scale bar: 1  $\mu\text{m}$ .
